# Supplementary material
Source: PubMed Central journal article supplement (PMC4171005)
Supplement: mabs-6-1013-s01.pdf [file mabs-6-1013-s01.pdf]

## **Supplemental Material to:**

**Yaima Tundidor, Claudia Patricia García-Hernández,  
Amaury Pupo, Yanelys Cabrera Infante,  
and Gertrudis Rojas**

**Delineating the functional map of the interaction between  
nimotuzumab and the epidermal growth factor receptor**

**mAbs 2014; 6(4)**

**<http://dx.doi.org/10.4161/mabs.28915>**

**<http://www.landesbioscience.com/journals/mabs/article/28915/>**

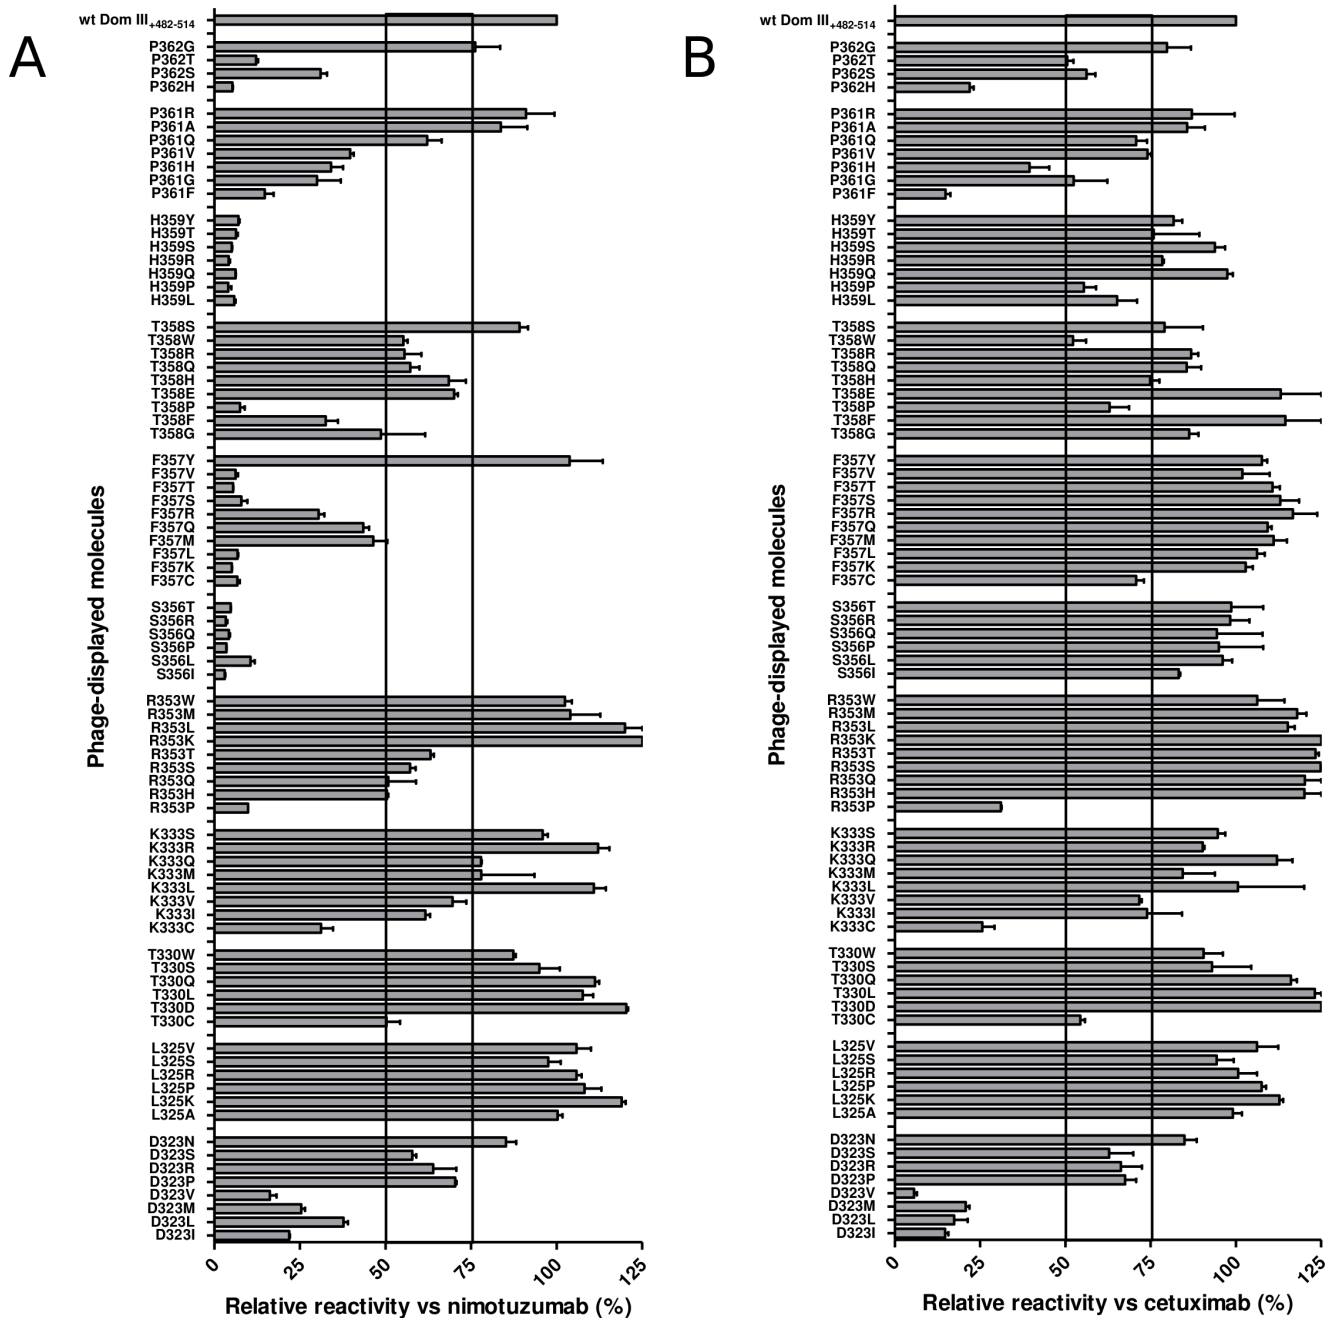

**Figure S1: Recognition of phage-displayed EGFR domain III variants with mutations in the antigenic region recognized by nimotuzumab.** Phages displaying EGFR Dom III<sub>482-514</sub> mutated variants with replacements within the solvent-exposed area surrounding the critical residue H359 were produced at a 50 ml scale. Phage-displayed wt Dom III<sub>482-514</sub> was included as a control. Purified phages ( $10^{12}$  viral particles/ml) were incubated on microtiter plates coated with either anti-EGFR mAbs (nimotuzumab (A) and cetuximab (B)) or the anti-*c-myc* tag 9E10 mAb. Bound phages were detected with an anti-M13 mAb conjugated to horseradish peroxidase. Normalized reactivity for each variant was estimated by dividing the signal obtained with each mAb by the reference signal (measured with the anti-tag mAb). Relative reactivity (%) was calculated as the ratio between normalized reactivity of each variant and that of wt domain III. Lines indicate 50% and 75% or relative reactivity.

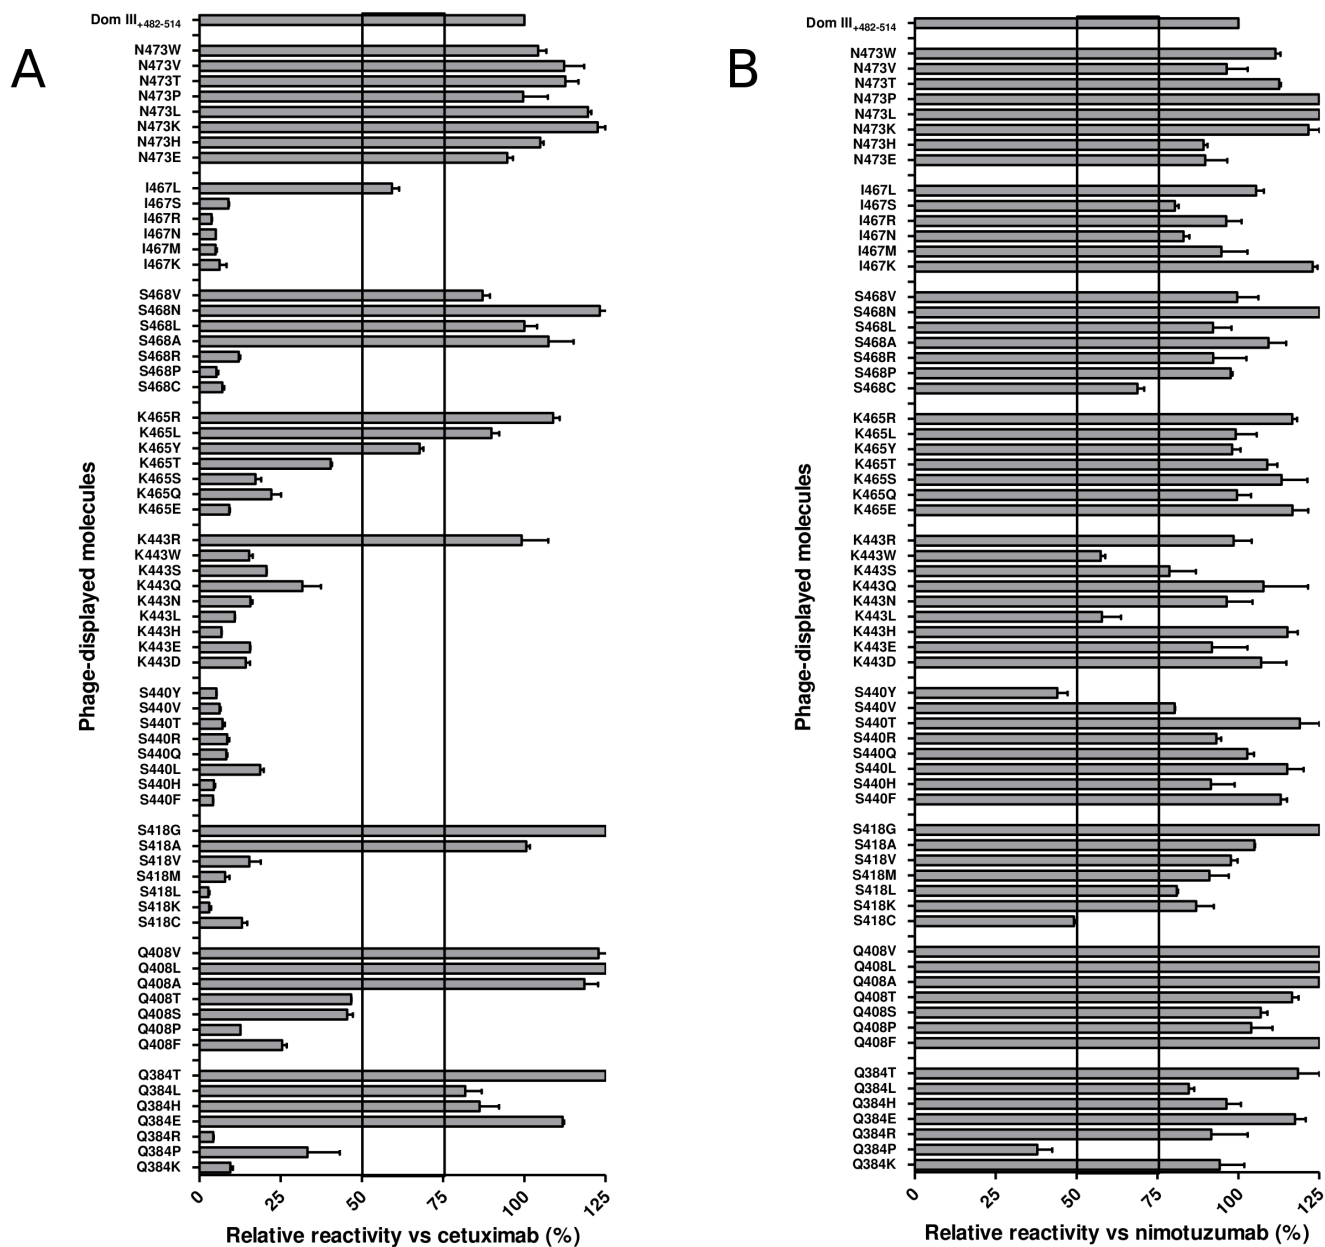

Figure S2: **Recognition of phage-displayed EGFR domain III variants with mutations within the cetuximab structural epitope.** Phages displaying EGFR Dom III<sub>+482-514</sub> mutated variants with replacements within the cetuximab structural epitope were produced at a 50 ml scale. Phage-displayed wt Dom III<sub>+482-514</sub> was included as a control. Purified phages ( $10^{12}$  viral particles/ml) were incubated on microtiter plates coated with either anti-EGFR mAbs (cetuximab (A) and nimotuzumab (B)) or the anti-*c-myc* tag 9E10 mAb. Bound phages were detected with an anti-M13 mAb conjugated to horseradish peroxidase. Normalized reactivity for each variant was estimated by dividing the signal obtained with each mAb by the reference signal (measured with the anti-tag mAb). Relative reactivity (%) was calculated as the ratio between normalized reactivity of each variant and that of wt domain III. Lines indicate 50% and 75% of relative reactivity.
